# Supplementary material for: Two-carbon metabolites, polyphenols and vitamins influence yeast chronological life span in winemaking conditions
Source: PubMed Central journal article supplement (PMC3503821; doi:10.1186/1475-2859-11-104), 2012-08-08
Supplement: 1475-2859-11-104-S1.pdf [file 1475-2859-11-104-S1.pdf]

Table S1. Initial viability of the chronological life span experiments (in cfu/mL x10<sup>6</sup>)

| <b>Figure</b>    | <b>Treatment</b>           | <b>cfu/mL x10<sup>6</sup></b> |
|------------------|----------------------------|-------------------------------|
| <b>Figure 1A</b> | All temperatures           | 90.77                         |
| <b>Figure 1B</b> | Control                    | 140.37                        |
|                  | Sorbitol 0.5 M             | 108.43                        |
|                  | Sorbitol 1 M               | 64.63                         |
| <b>Figure 1C</b> | pH 3.5                     | 73.33                         |
|                  | pH 4.5                     | 66.77                         |
|                  | pH 5.5                     | 86.33                         |
| <b>Figure 2A</b> | Wine                       | 24.75                         |
|                  | Evaporated wine            | 25.55                         |
|                  | Evaporated wine + 10% EtOH | 23.85                         |
|                  | Evaporated wine + 2% EtOH  | 23.80                         |
| <b>Figure 2C</b> | All conditions             | 50.33                         |
| <b>Figure 6A</b> | All conditions             | 66.60                         |
