# Supplementary material for: Two-carbon metabolites, polyphenols and vitamins influence yeast chronological life span in winemaking conditions
Source: PubMed Central journal article supplement (PMC3503821; doi:10.1186/1475-2859-11-104), 2012-08-08

Figure S1

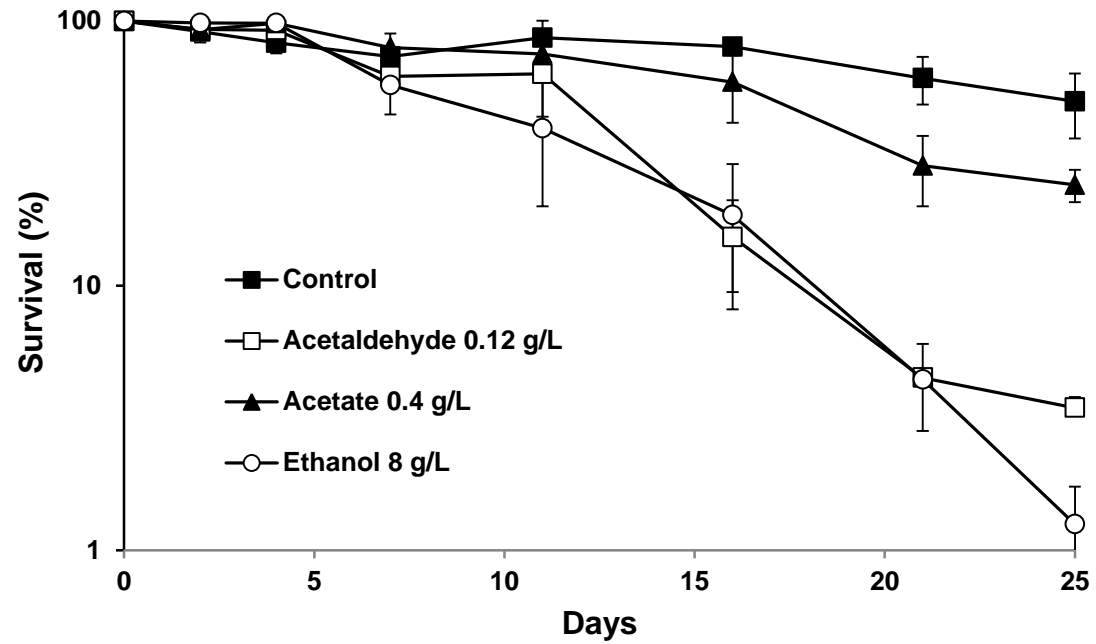

Supplement: 1475-2859-11-104-S2.pdf [file 1475-2859-11-104-S2.pdf]
